# Supplementary material for: Development of a gastroschisis core outcome set
Source: PubMed Central journal article supplement (PMC6762000; doi:10.1136/archdischild-2017-314560), 2018-03-14
Supplement: fetalneonatal-2017-314560supp001.pdf [file fetalneonatal-2017-314560supp001.pdf]

## Supplementary material 1 – Outcomes assessed in Delphi process

Red = outcomes from systematic review one

Blue = outcomes from systematic review two

Black = merged common term

|                                                 |                                                 |
|-------------------------------------------------|-------------------------------------------------|
| Time to first enteral feed                      | Time to first enteral feed                      |
| Time to first oral feed                         |                                                 |
| Time to full enteral feed                       | Time to full enteral feeds                      |
| Time to full oral feeds                         |                                                 |
| Incidence of PN                                 | Parenteral nutrition ever required              |
| Parenteral nutrition ever required              |                                                 |
| Duration of PN                                  | Time on parenteral nutrition                    |
| Time on parenteral nutrition                    | Time on <b>total</b> parenteral nutrition       |
| Time on <b>total</b> parenteral nutrition       |                                                 |
| Need for PN after discharge                     | Need for PN post discharge                      |
| Parenteral nutrition required post-discharge    |                                                 |
| Feeding, initiation of feed in NICU             | Feeding, initiation of feed in NICU             |
| Feeding, full feeds at discharge from NICU      | Feeding, full feeds at discharge from NICU      |
| Short gut syndrome                              | Short bowel syndrome                            |
| Short Bowel Syndrome                            |                                                 |
| Bowel lengthening procedure required            | Bowel lengthening procedure required            |
| Liver transplantation                           | Liver transplantation                           |
| Neurodevelopmental outcome                      | Neurodevelopmental outcomes                     |
| Neurodevelopmental delay                        |                                                 |
| Developmental milestones >6m                    | Developmental milestones >6m                    |
| Ever ventilated?                                | Ventilation ever required                       |
| Incidence of ventilation                        | Post-operative ventilation required             |
| Post-operative ventilation required             | Duration of respiratory support                 |
| Duration of respiratory support                 |                                                 |
| Total time on mechanical ventilation            | Duration of ventilation                         |
| Duration of ventilation                         | Ventilated beyond 24hr                          |
| Ventilated beyond 24hr                          |                                                 |
| Post closure time on mechanical ventilation     | Post closure time on mechanical ventilation     |
| Ventilation, peak inspiratory pressure          | Ventilation, peak inspiratory pressure          |
| Ventilation, peak concentration inspired oxygen | Ventilation, peak concentration inspired oxygen |
| Need for O2 after Discharge                     | Need for O2 after Discharge                     |
| Duration of O2                                  | Duration of O2                                  |
| Respiratory compromise                          | Respiratory compromise                          |
| Diagnosis of RDS                                |                                                 |
| Neonatal Respiratory Distress Syndrome          | Respiratory distress syndrome                   |
| Cholestasis                                     | Cholestasis                                     |

|                                                                 |                                                                 |
|-----------------------------------------------------------------|-----------------------------------------------------------------|
| Hypothyroidism                                                  | Hypothyroidism                                                  |
| Bacteraemia                                                     | Bacteraemia                                                     |
| pH, time acidotic                                               | pH, time acidotic                                               |
| Kidney dysfunction                                              | Kidney dysfunction                                              |
| Urine output                                                    | Urine output                                                    |
| Volume of IV fluid required                                     | Volume of IV fluid required                                     |
| Blood pressure, mean arterial                                   | Blood pressure, mean arterial                                   |
| Need for stoma                                                  | Need for stoma                                                  |
| Bowel Resection                                                 | Bowel Resection                                                 |
| Need for mesh at closure                                        | Need for mesh at closure                                        |
| Growth outcome                                                  | Unspecified measures of growth                                  |
| Weight gain                                                     | Weight<10th centile                                             |
| Weight<10th centile                                             | Length of hospital stay                                         |
| Length of Hospital Stay                                         | NICU length of stay                                             |
| Length of stay                                                  | Discharge, NICU to home                                         |
| NICU length of stay                                             | Total number of GA                                              |
| Discharge, NICU to home                                         | General anaesthesia, number of days, indication                 |
| Total number of GA                                              | Central-line usage ratio (days with central line/hospital days) |
| General anaesthesia, number of days, indication                 | Duration of antibiotics                                         |
| Central-line usage ratio (days with central line/hospital days) | Hospital charge                                                 |
| Duration of antibiotics                                         | Days to abdominal wall closure                                  |
| Hospital charge                                                 | Re-hospitalisation                                              |
| Days to abdominal wall closure                                  | Infectious complications                                        |
| Re-hospitalisation                                              | Infection, unspecified or other                                 |
| Infectious complications                                        | CVC sepsis                                                      |
| Infection, unspecified or other                                 | Infection, central line related                                 |
| CVC sepsis                                                      | Wound infection or breakdown                                    |
| Infection, central line related                                 | Infection with systemic sequelae                                |
| Wound infection or breakdown                                    | Infection free survival                                         |
| Infection with systemic sequelae                                | Infection, urinary or respiratory                               |
| Infection free survival                                         | Transfusion                                                     |
| Infection, urinary or respiratory                               | Number of transfusions                                          |
| Transfusion                                                     | Silo Complication                                               |
| Number of transfusions                                          | Bowel ischaemia                                                 |
| Silo Complication                                               | Ischaemic bowel                                                 |
| Bowel ischaemia                                                 | Anastomotic stricture                                           |
| Ischaemic bowel                                                 | Anastomotic stricture                                           |
| Anastomotic stricture                                           | Perforation                                                     |
| Anastomotic stricture                                           | Intestinal perforation                                          |
| Perforation                                                     | Intra-abdominal pressure                                        |
| Intestinal perforation                                          | Intra-abdominal pressure                                        |
| Intra-abdominal pressure                                        | Abdominal compartment syndrome                                  |
| Abdominal compartment syndrome                                  | Abdominal compartment syndrome                                  |

NEC  
NEC  
Stoma complication  
Obstruction  
Adhesional small bowel obstruction  
TPN liver disease  
Intestinal Failure Associated Liver  
Disease  
Re-operation  
Unplanned surgery  
Unplanned reoperation  
Reoperation, need for enlargement of  
gastroschisis defect  
Reoperation, need for silo replacement  
Ventral hernia  
Umbilical hernia  
GI complication  
Non-GI complication  
Retinopathy of prematurity  
Presence of peel  
Gestational Age  
C-section  
Birth weight  
Birth weight below 2500g  
APGAR at 5M  
APGAR at 10M  
Neonatal convulsions  
QT interval  
Simple vs. complex  
Birth Related Injury  
Cord pH<7.1 at birth  
Cosmesis

New outcome added in phase two  
following stakeholder nomination

New outcome added in phase two  
following stakeholder nomination

New outcome added in phase two  
following stakeholder nomination

New outcome added in phase two  
following stakeholder nomination

New outcome added in phase two  
following stakeholder nomination

New outcome added in phase two  
following stakeholder nomination

New outcome added in phase two  
following stakeholder nomination

NEC  
Stoma complication  
Bowel obstruction

Intestinal failure associated liver disease

Re-operation

Reoperation, need for enlargement of  
gastroschisis defect

Reoperation, need for silo replacement

Ventral hernia

GI complication

Non-GI complication

Retinopathy of prematurity#

Presence of peel

Gestational Age

C-section

Birth weight

Birth weight below 2500g

APGAR at 5M

APGAR at 10M

Neonatal convulsions

QT interval

Simple vs. complex

Birth Related Injury

Cord pH<7.1 at birth

Cosmesis

Quality of life for the child

Chronic gastrointestinal symptoms

Gastrointestinal dysfunction, including but not  
limited to constipation

Small bowel transplant

Meningitis

Mortality\*

Full oral feed achieved without any mechanical  
assistance

New outcome added in phase two following stakeholder nomination  
New outcome added in phase two following stakeholder nomination  
New outcome added in phase two following stakeholder nomination  
New outcome added in phase two following stakeholder nomination  
Existing outcome from phase one modified for phase two

Total number of days with a central line  
Discharge home with mechanical feeding assistance  
Societal costs, including financial cost for the family  
Home **total** parenteral nutrition  
Need for stoma split into “need for a permanent stoma” and “Need for temporary stoma”

# Did not meet criteria for assessment in phase three of the Delphi process

\*Inadvertently omitted from phase one of the Delphi process due to an error in transcription of outcomes from the reviews to the Delphi software
